# Supplementary material
Source: MDPI journal article supplement (https://www.mdpi.com/2673-4605/6/1/32)
Supplement: s1 [file s1]

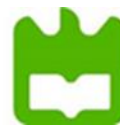

# Data Science Framework to Select Corrosion Inhibitors

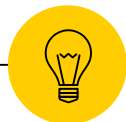

***Tiago L. P. Galvão***

***Gerard Novell-Leruth, Inês Ferreira,***

***Alena Kuznetsova, José R. B. Gomes, João Tedim***

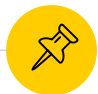

**Aim**

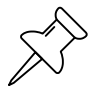

*Selection*

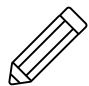

*Design*

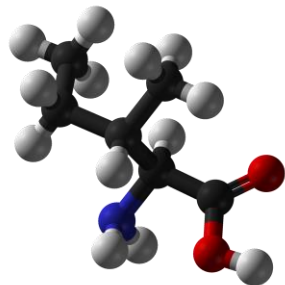

**Organic Corrosion Inhibitors**

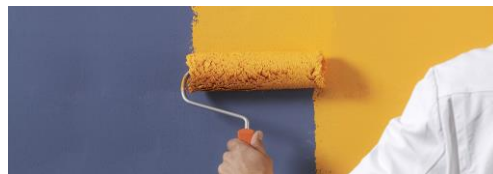

**Coatings**

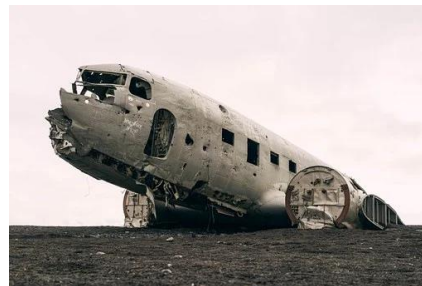

**Corrosion Protection**



## Approach

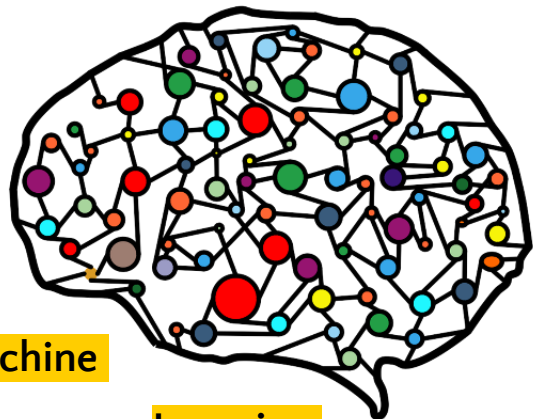

Machine

Learning

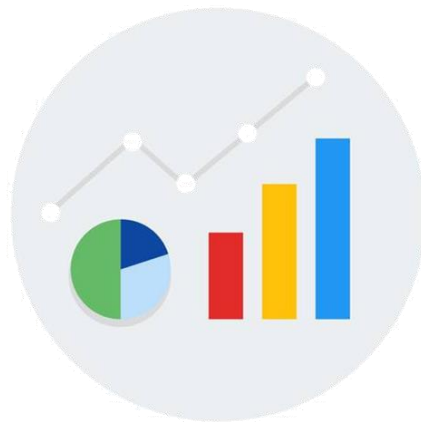

Data Driven

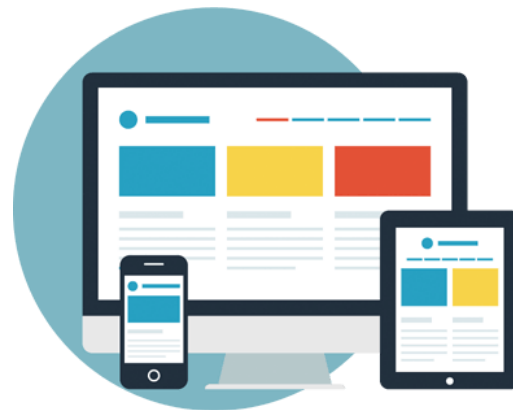

Web App

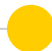

---

1

# Selection

Web app

---

# Interactive Corrosion Inhibitor Efficiencies

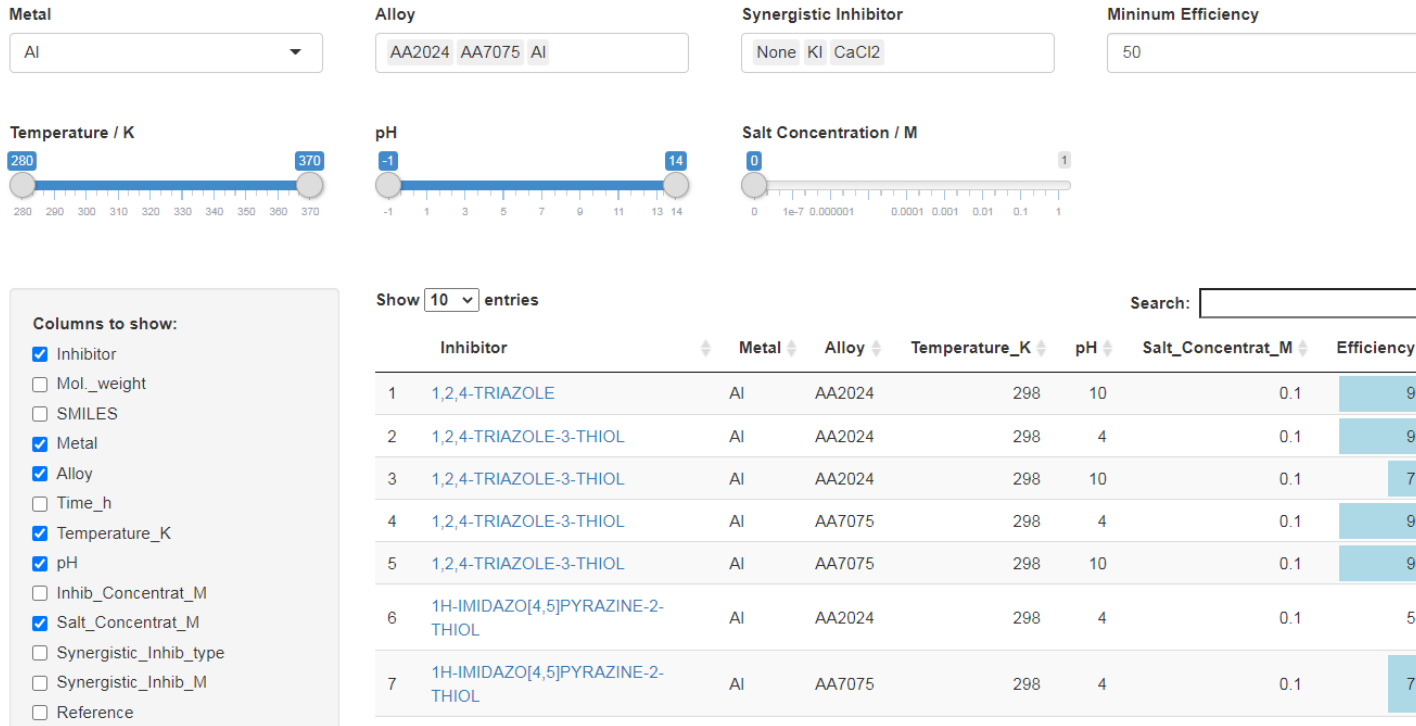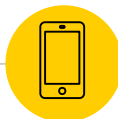

<https://datacor.shinyapps.io/cordata/>

Metal

Al

Alloy

AA2024

AA7075

Al

Synergistic Inhibitor

None

KI

CaCl<sub>2</sub>

Minimum Efficiency

50

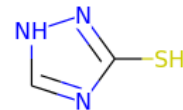

Temperature / K

280

370

280 300 320 340 360

pH

-1

14

-1 1 3 5 7 9 11 13 14

Minimum Salt Concent. / M

0

1

0 1e-7 0.000001 0.0001 0.01 0.1 1

Search for the appropriate conditions

Columns to show:

- ☒ Inhibitor
- ☐ Mol\_weight
- ☐ SMILES
- ☒ Metal
- ☒ Alloy
- ☐ Time\_h
- ☒ Temperature\_K
- ☒ pH
- ☐ Inhib\_Concentrat\_M
- ☒ Salt\_Concentrat\_M
- ☐ Synergistic\_Inhib\_type
- ☐ Synergistic\_Inhib\_M
- ☐ Reference

Select and compare  
different properties

Quickly check the inhibitor  
structure and the reference

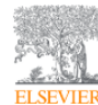

Corrosion Science

Volume 106, May 2016, Pages 229-235

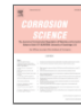

Using high throughput experimental data and  
*in silico* models to discover alternatives to toxic  
chromate corrosion inhibitors

D.A. Winkler <sup>a, b, c, d, e, f, g, h, i, j, k, l, m, n, o, p, q, r, s, t, u, v, w, x, y, z</sup>, M. Breedon <sup>a</sup>, P. White <sup>a</sup>, A.E. Hughes <sup>a, c, e</sup>, E.D. Sapper <sup>a</sup>, I. Cole <sup>a</sup>

INCLUDE YOUR CORROSION DATA

SUBMIT | GET DATASET | FEEDBACK

Dataset available to  
contributors

It's free

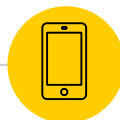

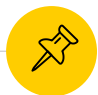

## Data Included

|                    | Al        | Cu     | Mg      | Fe         | All       |
|--------------------|-----------|--------|---------|------------|-----------|
| Efficiencies       | 570       | 108    | 257     | 854        | 1901      |
| Compounds          | 108       | 24     | 25      | 40         | 146       |
| Metal/Alloys       | 4         | 3      | 14      | 8          | 29        |
| pH range           | [−0.3,11] | [0,13] | [7,8.2] | [−0.5,7.3] | [−0.5,13] |
| Synergistic Inhib. | Yes       | Yes    | No      | Yes        | Yes       |
| References         | 6         | 24     | 3       | 40         | 72        |

---

2

# Design

Machine Learning

---





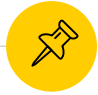

## Algorithm performance

Individual models vs Composite Model

pH 4

pH 10

AA  
2024

AA  
7075

|      |       |
|------|-------|
| pH 4 | pH 10 |
| AA   | AA    |
| 2024 | 7075  |

Can we model different conditions in the same model?



# Algorithm performance

## Individual Models

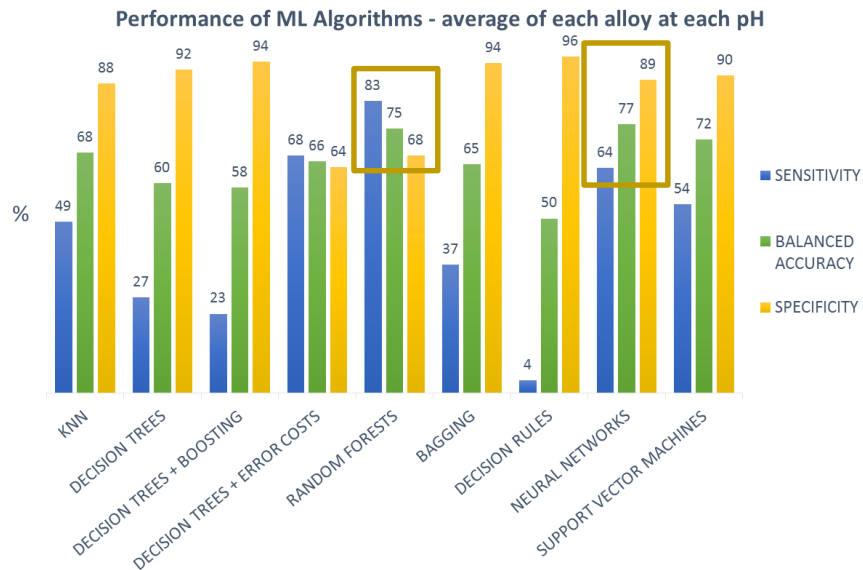

Inhibitors: > 50 % efficiency

Best methods:

- 1) Neural Networks
- 2) Random Forests



# Algorithm performance

## Individual Models



Inhibitors: > 50 % efficiency

## Composite Model

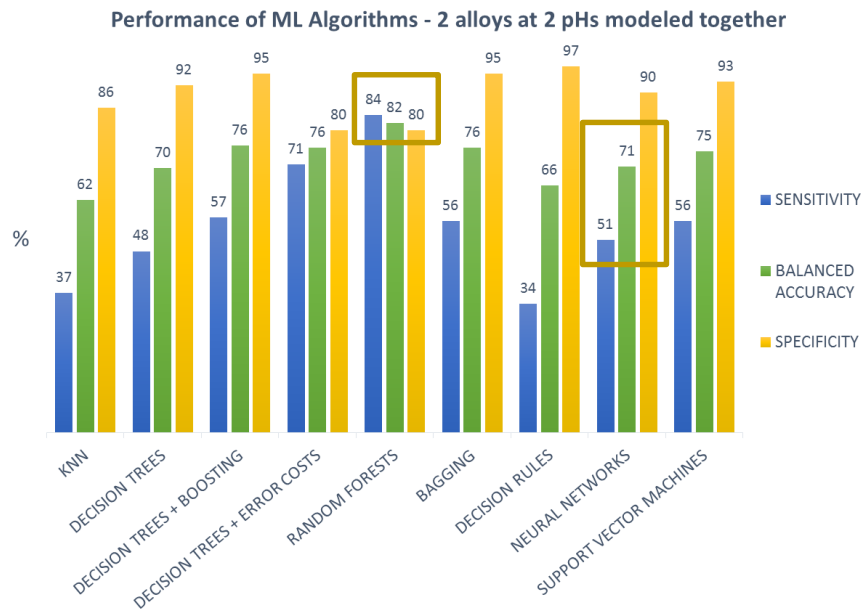



## Algorithm performance

Random Forests:

- Best method
- All Tree based methods improve
- Benefits from more data (102 → 408)

We can model different conditions within the same model

## Composite Model

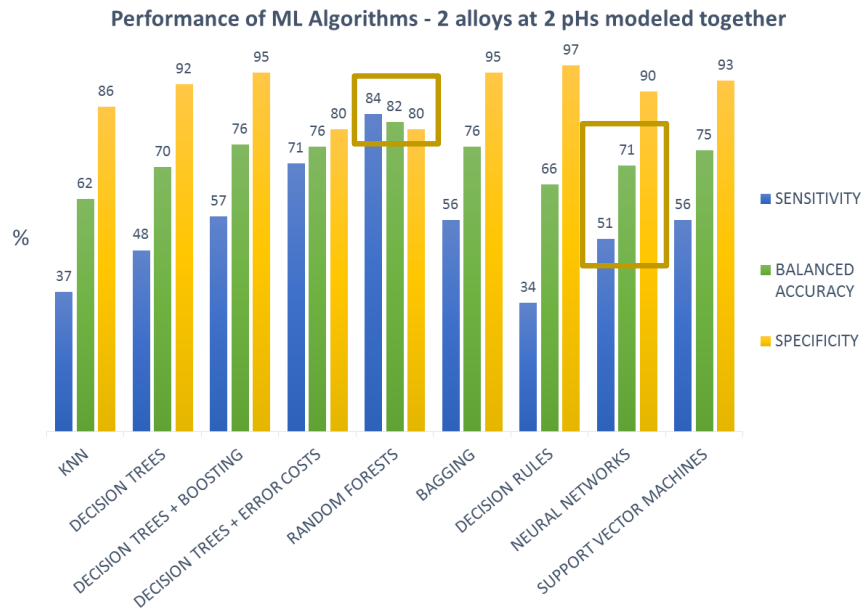



## Data from different sources: workflow

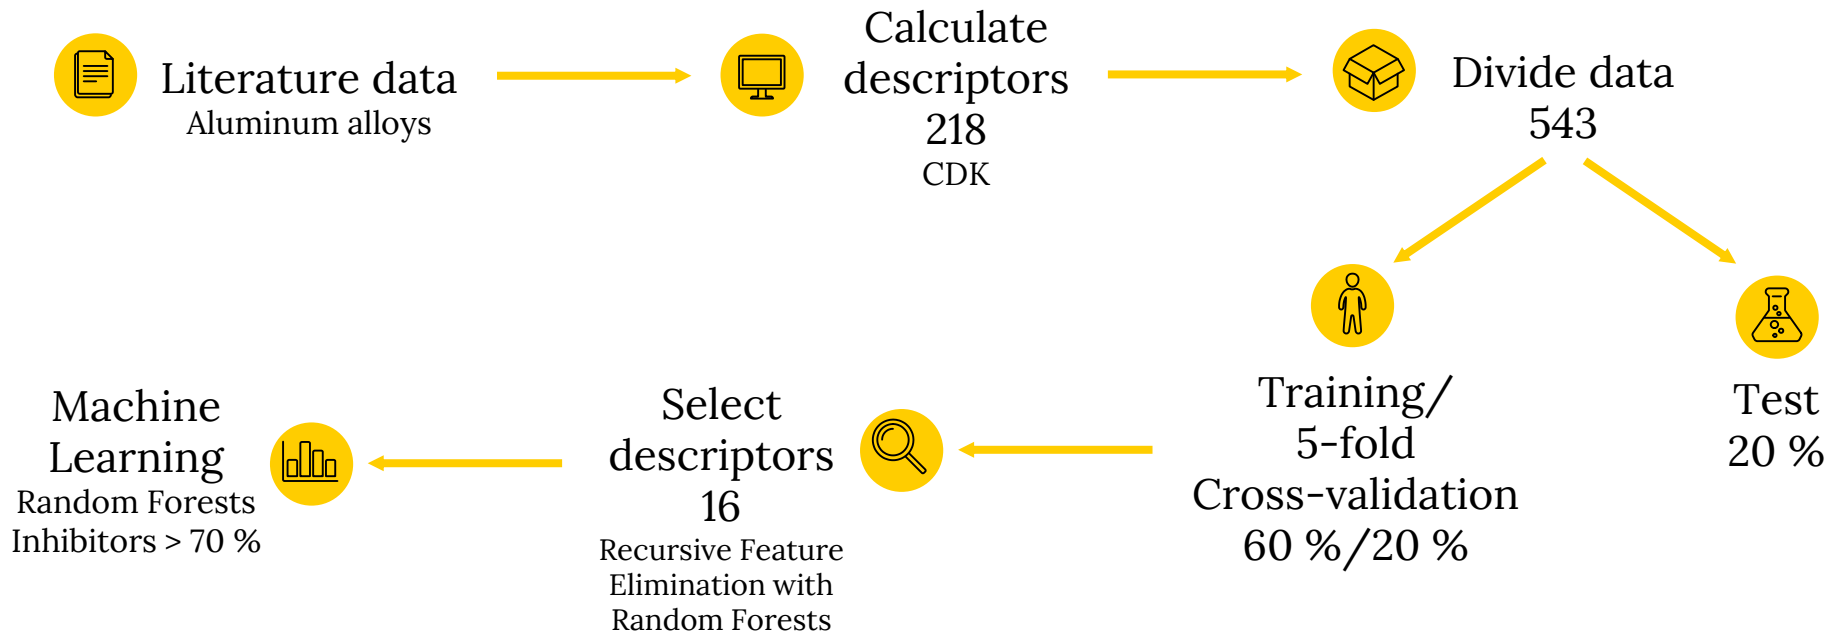



## Data from different sources: results

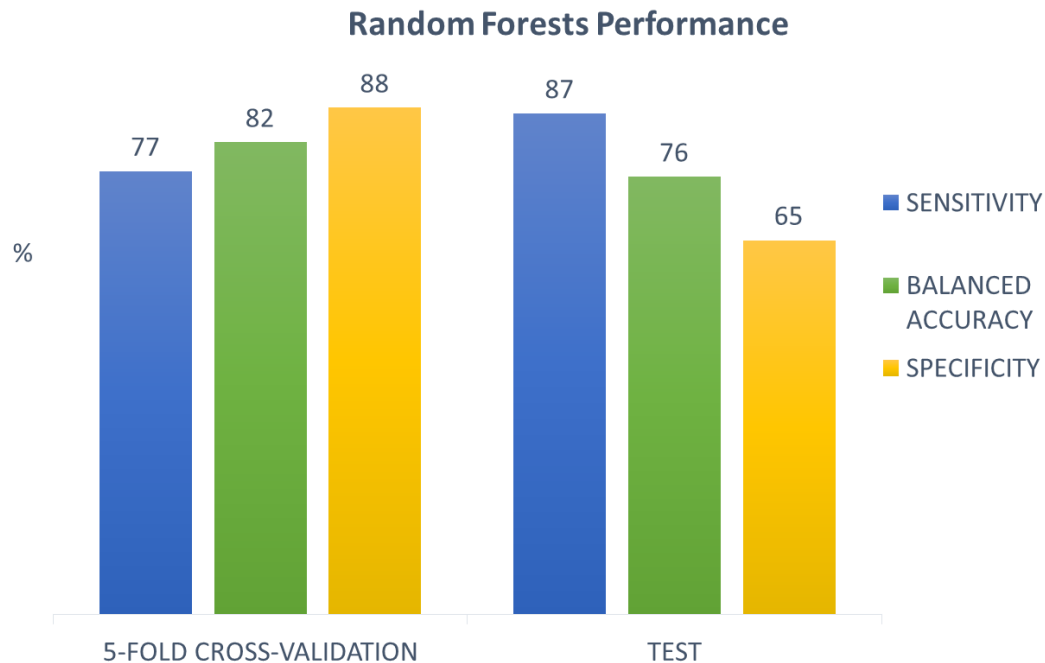



## Data from different sources: descriptors

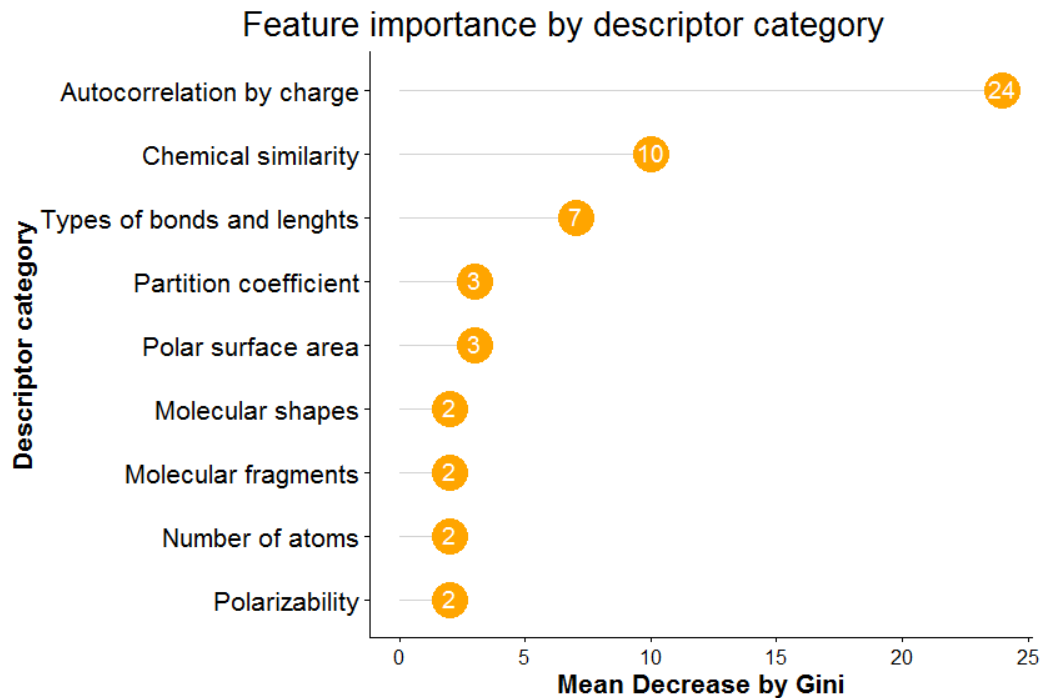

Conditions:

- Acidic:  $\text{pH} \leq 4$
- Near neutral:  $4 < \text{pH} < 10$
- Basic:  $\text{pH} \geq 10$





## Conclusions

- An open data management web tool is freely available to organize, search and select corrosion inhibition efficiencies of compounds under different conditions.
- A machine learning framework is being developed for aluminum alloys capable of considering data from different sources and making predictions for different pHs.

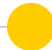



# Acknowledgements

DATA COR

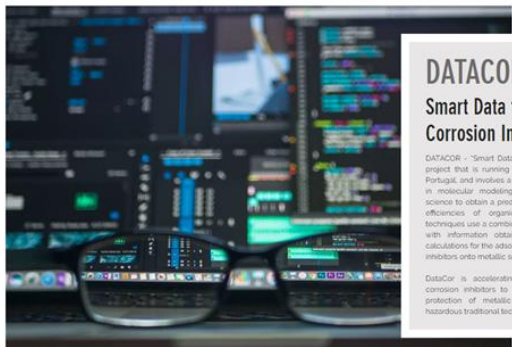

## DATA COR

### Smart Data to Design Corrosion Inhibitors

DATA COR - "Smart Data to Design Corrosion Inhibitors" is a project that is running at the University of Aveiro (UA), in Portugal, and involves a multidisciplinary team with expertise in molecular modelling, machine learning and corrosion science to obtain a predictive model of corrosion inhibitor efficiencies of organic compounds. Machine learning techniques use a combination of experimental corrosion data with information obtained by means of computational calculations for the adsorption and self-assembly of corrosion inhibitors onto metallic surfaces.

DataCor is accelerating the discovery of new organic corrosion inhibitors to be embedded in coatings for the protection of metallic alloys and substitute extremely hazardous traditional technologies.

## DataCor project

POCI-01-0145-FEDER-030256

PTDC/QUI-QFI/30256/2017)

<https://datacorproject.wixsite.com/datacor>

CICECO-Aveiro Institute of Materials (refs. UID/CTM/50011/2019 and POCI/01/0145/FEDER/007679) financed by national funds through the Fundação para a Ciência e a Tecnologia (FCT/MCTES) and co-financed by FEDER under the PT2020 Partnership Agreement.

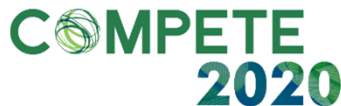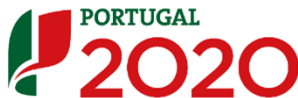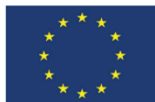

UNIÃO EUROPEIA  
Fundo Europeu  
de Desenvolvimento Regional

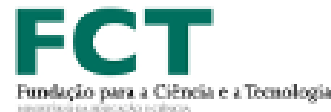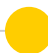

# Thank You!

You can find me at  
*[tlpgalvao@ua.pt](mailto:tlpgalvao@ua.pt)*
